# Supplementary material for: Concomitant 1q+ and t(4;14) influences disease characteristics, immune system, and prognosis in double-hit multiple myeloma
Source: PubMed Central journal article supplement (PMC10638414; doi:10.1038/s41408-023-00943-2), 2023-11-10
Supplement: 41408_2023_943_MOESM1_ESM.pdf [file 41408_2023_943_MOESM1_ESM.pdf]

**Concomitant 1q+ and t(4;14) influences disease characteristics, immune system,  
and prognosis in double-hit Multiple Myeloma**

**Authors:**

Michael Ozga<sup>1</sup>, Qihong Zhao<sup>1</sup>, Laila Huric<sup>1</sup>, Cecelia Miller<sup>2</sup>, Ashley Rosko<sup>1</sup>, Abdullah Khan<sup>1</sup>, Elvira Umyarova<sup>1</sup>, Don Benson<sup>1</sup>, and Francesca Cottini<sup>1</sup>.

<sup>1</sup> The Ohio State University Comprehensive Cancer Center, Department of Internal Medicine, Division of Hematology, Columbus, OH, USA

<sup>2</sup> The Ohio State University Comprehensive Cancer Center, Department of Pathology, Columbus, OH, USA

**Correspondence:**

Francesca Cottini, MD (lead contact)

Assistant Professor of Medicine

Division of Hematology

The Ohio State University, College of Medicine

385G Wiseman Hall | 400 W 12<sup>th</sup> Ave |

Columbus OH 43210-1240 USA

Email: francesca.cottini@osumc.edu

## *Supplementary Contents:*

### **1. Extended Methods:**

- 1.1. Patient characteristics
- 1.2. Definition of Responses and outcomes
- 1.3. Peripheral blood sample collection, isolation, and flow cytometry staining
- 1.4. CD56 flow cytometry analysis
- 1.5. RNA-sequencing Analysis
- 1.6. Statistical analysis

### **2. Supplementary Tables:**

**Supplementary Table S1.** Patient characteristics of the full cohort of patients independently of chromosomal abnormality cutoffs.

**Supplementary Table S2.** Patient characteristics for 1q21+ or 1q23+ analyses.

**Supplementary Table S3.** Patient characteristics for 1q+ analysis.

**Supplementary Table S4.** Regression analysis for factors associated with progression-free survival (PFS) or Overall survival (OS) in the different groups.

### **3. Supplementary Figures:**

**3.1. Supplementary Figure S1.** Outcomes of all patients with the defined chromosomal abnormalities.

**3.2. Supplementary Figure S2.** Study design and response rates.

**3.3. Supplementary Figure S3.** CD56 clone size and mRNA expression in the different subgroups.

**3.4. Supplementary Figure S4.** Immune profiling in selected patients with 1q+ only, t(4;14) only, or DH MM.

## **1. Extended methods:**

### **1.1. Patient characteristics**

This study was approved by the Ohio State University Institutional Review Board (2021C0118) after providing written informed consent for the Ohio State University MM registry (OSU-10115) in accordance with the Declaration of Helsinki. Specific cytogenetic abnormalities (CA) present at diagnosis included the presence of gain/amplification of chromosome arm 1q (1q21 (CKS1B, Cytocell) or 1q23 (PBX1, Abbott)), or t(4;14) (Abbott) as single abnormalities or in combination. CD138 enrichment was performed prior to FISH testing using the EasySep Human CD138 Positive Selection Cocktail. 200 interphases were analyzed for each probe, to provide sufficient cellularity. 1q copy numbers were used to define gains as the presence of 3 copies of 1q21+ or 1q23+ probes and amplifications as the presence of 4 or more copies of 1q21+ or 1q23+ probes by FISH.

### **1.2. Definition of Responses and outcomes**

Response criteria were based on the International Myeloma Working Group synopsis and included complete responses (CR), very good partial responses (VGPR), partial responses (PR), stable disease (SD), or progressive disease (PD). Primary endpoints were progression-free survival (PFS) and overall survival (OS) after autologous stem cell transplant (ASCT). Kaplan Meier curves were used to calculate PFS and OS. Secondary endpoints included the identification of disease characteristics and their associations with PFS and OS. All tests were two-sided with p-values <0.05 considered statistically significant.

### **1.3. Peripheral blood sample collection, isolation, and flow cytometry staining**

Peripheral blood samples from 7 healthy donors purchased from *Versiti, Inc* and 24 patients with active MM disease and the studied CA were separated by density gradient centrifugation over Ficoll-Paque, washed with centrifugation with room-temperature phosphate-buffered saline (PBS), and stained with the following flow cytometry fluorescent antibodies:

| Antigen      | Clone        | Fluorophore | Supplier      | Catalogue number |
|--------------|--------------|-------------|---------------|------------------|
| CD3          | BW264/56     | VioBlue     | Miltenyi      | 170-081-046      |
| CD4          | RPA-T4 (RUO) | FITC        | BD Bioscience | 555346           |
| CD8          | BW135/80     | APC         | Miltenyi      | 130-113-154      |
| LAG3/CD223   | REA351       | PE          | Miltenyi      | 130-120-470      |
| PD1/CD279    | MIH4         | PE          | BD Bioscience | 557946           |
| CD28         | 15E8         | PE          | Miltenyi      | 130-126-172      |
| CD25         | M-A251       | APC         | BD Bioscience | 555434           |
| CD57         | NK-1         | FITC        | BD Bioscience | 555619           |
| CD45RA       | HI100        | PE          | BD Bioscience | 561883           |
| CD62L        | 145/15       | VioBlue     | Miltenyi      | 130-114-148      |
| CD16         | 3G8          | FITC        | BD Bioscience | 555406           |
| CD56         | REA196       | APC Vio770  | Miltenyi      | 130-114-548      |
| CD56         | B159         | APC         | BD Bioscience | 555518           |
| CD94         | HP-3D9       | PE          | BD Bioscience | 555889           |
| NKG2A/CD159a | REA110       | APC         | Miltenyi      | 130-113-563      |
| CD226        | DX11         | PE          | BD Bioscience | 559789           |
| CD69         | FN50         | PE          | Miltenyi      | 130-113-524      |
| NKG2D/CD314  | 1D11         | PE          | BD Bioscience | 557940           |

Cells were then incubated at room temperature for 20 minutes in a dark environment, re-washed with room-temperature PBS, and analyzed using an AttuneX machine. Post-acquisition analyses and t-distributed stochastic neighbor embedding (t-SNE) analyses were performed using FlowJo software.

#### 1.4. CD56 flow cytometry analysis

The percentage of CD56-expressing CD138-positive, light-chain restricted MM cells (CD56 clone size) was obtained from the bone marrow aspirate at diagnosis. This staining was performed for clinical purposes in the Flow Cytometry Laboratory at The Ohio State University Wexner Medical Center, which is regulated under Clinical Laboratory

Improvement Amendments. CD56 clone size was correlated with the specific genomic abnormalities (1q21+ only, 1q23+ only, t(4;14), and Double Hit-DH).

### **1.5. RNA-sequencing Analysis**

RNA-sequencing data were analyzed from MMRF CoMMpass. The MMRF data were generated as part of the Multiple Myeloma Research Foundation Personalized Medicine Initiatives. CD56 FKPM levels were correlated with the specific genomic abnormalities (1q+, t(4;14), and 1q+ and t(4;14)).

### **1.6. Statistical Analysis**

Demographic and disease characteristics were summarized using medians and ranges for continuous variables, and frequencies and percentages for categorical variables. They were compared among cytogenetic groups using the Wilcoxon rank sum test, chi-square test or Fisher's exact test, respectively. PFS was calculated from ASCT to progression or death censoring those without progression at last followup and was estimated using the Kaplan-Meier method and compared between groups using the log-rank test. Overall survival was calculated from ASCT to death censoring those alive at last contact and compared using the log-rank test. Cox proportional hazard regression models were used to estimate the hazard ratios for risk of progression or death. The multivariable Cox model was built including all the variables significantly associated with PFS or OS in the univariable model. Analyses were performed using Stata version 17 (StataCorp, College Station, Texas), and all statistical tests were two-sided with statistical significance at 0.05.

## 2. Supplemental Tables:

**Supplementary Table S1.** Patient characteristics of the full cohort of patients independently of CA cutoffs.

|                                         |                     | <b>All<br/>(n = 243)</b> | <b>1q+<br/>(n = 198)</b> | <b>t(4;14)<br/>(n = 13)</b> | <b>DH<br/>(n = 32)</b> | <b>p</b> |
|-----------------------------------------|---------------------|--------------------------|--------------------------|-----------------------------|------------------------|----------|
| <b>Age at diagnosis</b> , Median, Range |                     | 61.0 (35-90)             | 62.0 (35-90)             | 61.0 (40-86)                | 58.0 (40-71)           | 0.078    |
| <b>Gender</b> (no, %)                   |                     |                          |                          |                             |                        |          |
|                                         | Female              | 112 (46.1)               | 92 (46.5)                | 3 (23.1)                    | 17 (53.1)              | 0.18     |
|                                         | Male                | 131 (53.9)               | 106 (53.5)               | 10 (76.9)                   | 15 (46.9)              |          |
| <b>Race</b> (no, %)                     |                     |                          |                          |                             |                        |          |
|                                         | NHW                 | 204 (84.0)               | 167 (84.3)               | 11 (84.6)                   | 26 (81.3)              | 0.84     |
|                                         | NHB                 | 35 (14.4)                | 27 (13.6)                | 2 (15.4)                    | 6 (18.8)               |          |
|                                         | Other               | 4 (1.6)                  | 4 (2.0)                  | 0                           | 0                      |          |
| <b>MM Subtype</b> (no, %)               |                     |                          |                          |                             |                        |          |
|                                         | IgG                 | 134 (55.1)               | 114 (57.6)               | 6 (46.2)                    | 14 (43.8)              | 0.05     |
|                                         | IgA                 | 64 (26.3)                | 42 (21.2)                | 5 (38.5)                    | 17 (53.1)              |          |
|                                         | IgD                 | 7 (2.9)                  | 7 (3.5)                  | 0 (0)                       | 0 (0)                  |          |
|                                         | IgM                 | 1 (0.4)                  | 1 (0.5)                  | 0 (0)                       | 0 (0)                  |          |
|                                         | Light chain disease | 35 (14.4)                | 32 (16.2)                | 2 (15.4)                    | 1 (3.1)                |          |
|                                         | Non secretory       | 2 (0.8)                  | 2 (1.0)                  | 0 (0)                       | 0                      |          |
| <b>R-ISS stage</b> (no, %)              |                     |                          |                          |                             |                        |          |
|                                         | I                   | 33 (21.0)                | 33 (27.3)                | 0 (0)                       | 0 (0)                  | 0.003    |
|                                         | II                  | 91 (58.0)                | 65 (53.7)                | 6 (54.5)                    | 20 (80)                |          |
|                                         | III                 | 33 (21.0)                | 23 (19.0)                | 5 (45.5)                    | 5 (20)                 |          |
| <b>ISS stage</b> (no, %)                |                     |                          |                          |                             |                        |          |
|                                         | I                   | 69 (34.3)                | 55 (34.0)                | 3 (27.3)                    | 11 (39.3)              | 0.48     |
|                                         | II                  | 70 (34.8)                | 55 (34.0)                | 3 (27.3)                    | 12 (42.9)              |          |
|                                         | III                 | 62 (30.8)                | 52 (32.1)                | 5 (45.5)                    | 5 (17.9)               |          |
| <b>Hgb</b> (no, %)                      |                     |                          |                          |                             |                        |          |
|                                         | < 10 g/dL           | 83 (35.6)                | 63 (33.5)                | 6 (46.2)                    | 14 (43.8)              | 0.38     |
| <b>Serum creatinine</b> (no, %)         |                     |                          |                          |                             |                        |          |
|                                         | ≥ 2 mg/dL           | 49 (21.1)                | 39 (20.9)                | 5 (38.5)                    | 5 (15.6)               | 0.23     |
| <b>Calcium</b> (no, %)                  |                     |                          |                          |                             |                        |          |
|                                         | ≥ 1 mg/dL           | 28 (12.5)                | 24 (13.4)                | 1 (7.7)                     | 3 (9.4)                | 0.71     |
| <b>Albumin</b> (no, %)                  |                     |                          |                          |                             |                        |          |
|                                         | < 3.5 g/dL          | 89 (41.4)                | 69 (40.1)                | 7 (58.3)                    | 13 (41.9)              | 0.46     |
| <b>LDH</b> (no, %)                      |                     |                          |                          |                             |                        |          |
|                                         | ≥ 190 IU/L          | 55 (34.8)                | 44 (35.2)                | 4 (44.4)                    | 7 (29.2)               | 0.70     |
| <b>Beta-2 microglobulin</b> (no, %)     |                     |                          |                          |                             |                        |          |
|                                         | < 3.5 mg/L          | 99 (48.5)                | 76 (46.1)                | 5 (45.5)                    | 18 (64.3)              | 0.27     |
|                                         | 3.5-5.5 mg/L        | 45 (22.1)                | 39 (23.6)                | 1 (9.1)                     | 5 (17.9)               |          |
|                                         | > 5.5 mg/L          | 60 (29.4)                | 50 (30.3)                | 5 (45.5)                    | 5 (17.9)               |          |
| <b>t(11;14)</b> (no, %)                 |                     |                          |                          |                             |                        |          |
|                                         | Yes                 | 44 (18.1)                | 42 (21.2)                | 1 (7.7)                     | 1 (3.2)                | 0.03     |
|                                         | No                  | 199 (81.9)               | 156 (78.8)               | 12 (92.3)                   | 31 (96.8)              |          |
| <b>del(13q)</b> (no, %)                 |                     |                          |                          |                             |                        |          |
|                                         | Yes                 | 144 (59.3)               | 112 (56.6)               | 7 (53.9)                    | 25 (78.2)              | 0.06     |
|                                         | No                  | 99 (40.7)                | 86 (43.4)                | 6 (46.1)                    | 7 (21.8)               |          |

|                                   |                            |                  |            |           |           |        |
|-----------------------------------|----------------------------|------------------|------------|-----------|-----------|--------|
| <b>del(17p)</b> (no, %)           | Yes                        | 31 (12.8)        | 26 (13.1)  | 1 (7.7)   | 4 (12.5)  | 0.85   |
|                                   | No                         | 212 (87.2)       | 172 (86.9) | 12 (92.3) | 28 (87.5) |        |
| <b>MAF translocations</b> (no, %) | Yes                        | 12 (4.9)         | 9 (4.6)    | 0         | 3 (9.4)   | 0.35   |
|                                   | No                         | 231 (95.1)       | 189 (95.4) | 13 (100)  | 29 (90.6) |        |
| <b>Copy Numbers of 1q</b> (no, %) |                            | <b>(n = 230)</b> |            |           |           |        |
|                                   | 3 (gains)                  | 185 (80.4)       | 159 (80.3) | 0         | 26 (81.2) | <0.001 |
|                                   | 4 or more (amplifications) | 45 (19.6)        | 39 (19.7)  | 0         | 6 (18.8)  |        |
| <b>Induction regimen</b> (no, %)  | CyBorD                     | 29 (11.9)        | 21 (10.6)  | 3 (23.1)  | 5 (15.6)  | 0.90   |
|                                   | VD                         | 86 (35.4)        | 71 (35.9)  | 5 (38.5)  | 10 (31.3) |        |
|                                   | RD                         | 40 (16.5)        | 33 (16.7)  | 2 (15.4)  | 5 (15.6)  |        |
|                                   | VRD                        | 58 (23.9)        | 47 (23.7)  | 2 (15.4)  | 9 (28.1)  |        |
|                                   | Other                      | 30 (12.3)        | 26 (13.1)  | 1 (7.7)   | 3 (9.4)   |        |
|                                   |                            |                  |            |           |           |        |
| <b>Best response</b> (no, %)      | CR                         | 30 (12.3)        | 20 (10.1)  | 2 (15.4)  | 8 (25.0)  | 0.28   |
|                                   | VGPR                       | 86 (35.4)        | 72 (36.4)  | 5 (38.5)  | 9 (28.1)  |        |
|                                   | PR                         | 87 (35.8)        | 73 (36.9)  | 5 (38.5)  | 9 (28.1)  |        |
|                                   | SD                         | 34 (14.0)        | 29 (14.6)  | 0         | 5 (15.6)  |        |
|                                   | PD                         | 6 (2.5)          | 4 (2.0)    | 1 (7.7)   | 1 (3.1)   |        |
|                                   |                            |                  |            |           |           |        |
| <b>Response</b> (no, %)           | CR/VGPR                    | 116 (47.7)       | 92 (46.5)  | 7 (53.8)  | 17 (53.1) | 0.79   |
|                                   | PR                         | 87 (35.8)        | 73 (36.9)  | 5 (38.5)  | 9 (28.1)  |        |
|                                   | SD/PD                      | 40 (16.5)        | 33 (16.7)  | 1 (7.7)   | 6 (18.8)  |        |
| <b>ASCT</b> (no, %)               | No                         | 73 (30.0)        | 61 (30.8)  | 5 (38.5)  | 7 (21.9)  | 0.47   |
|                                   | Yes                        | 170 (70.0)       | 137 (69.2) | 8 (61.5)  | 25 (78.1) |        |
| <b>Maintenance</b> (no, %)        | No                         | 25 (14.7)        | 18 (13.1)  | 2 (25.0)  | 5 (20.0)  | 0.47   |
|                                   | Yes                        | 145 (85.3)       | 119 (86.9) | 6 (75.0)  | 20 (80.0) |        |

**Abbreviations:** DH, double Hit; *p*, p-value; NHW, non-hispanic white; NHB, non-hispanic black; MM, Multiple Myeloma; ISS, International staging system; R-ISS, Revised-ISS; Hgb, hemoglobin; LDH, lactate dehydrogenase; CA, chromosomal abnormalities; *MAF* translocations (t(14;16) or 14;20)); CyBorD, cyclophosphamide, bortezomib, dexamethasone; VD, bortezomib, dexamethasone; RD, lenalidomide, dexamethasone; VRD, bortezomib, lenalidomide, dexamethasone; CR, complete response; VGPR, very good partial response; PR, partial response; SD, stable disease; PD, progressive disease; ASCT, autologous stem cell transplant.

**Supplementary Table S2. Patient characteristics for 1q21+ or 1q23+ analyses.**

|                                        | 1q21+ analysis    |                 |                  |             |       | 1q23+ analysis     |                |                  |             |       |
|----------------------------------------|-------------------|-----------------|------------------|-------------|-------|--------------------|----------------|------------------|-------------|-------|
|                                        | "Low CA" (n = 75) | 1q21+ (n = 129) | t(4;14) (n = 14) | DH (n = 25) | P     | "Low CA" (n = 118) | 1q23+ (n = 86) | t(4;14) (n = 20) | DH (n = 19) | P     |
| <b>Age at diagnosis, Median, Range</b> | 61.0 (38-86)      | 62.0 (35-90)    | 59.5 (40-71)     | 55 (40-71)  | 0.04  | 62 (35-86)         | 62 (39-90)     | 60 (40-71)       | 54 (45-70)  | 0.04  |
| <b>Gender (n, %)</b>                   |                   |                 |                  |             |       |                    |                |                  |             |       |
| Female                                 | 31 (41.3)         | 63 (48.8)       | 2 (14.3)         | 16 (64)     | 0.02  | 51 (43.2)          | 43 (50)        | 8 (40)           | 10 (52.6)   | 0.67  |
| Male                                   | 44 (58.7)         | 66 (51.2)       | 12 (85.7)        | 9 (36)      |       | 67 (56.8)          | 43 (50)        | 12 (60)          | 9 (47.4)    |       |
| <b>Race (n, %)</b>                     |                   |                 |                  |             |       |                    |                |                  |             |       |
| NHW                                    | 65 (86.7)         | 107 (83)        | 11 (78.6)        | 21(84)      | 0.92  | 95 (80.5)          | 77 (89.5)      | 16 (80)          | 16 (84.2)   | 0.38  |
| NHB                                    | 9 (12)            | 19 (14.7)       | 3 (21.4)         | 4 (16)      |       | 19 (16.1)          | 9 (10.5)       | 4 (20)           | 3 (15.8)    |       |
| Other                                  | 1 (1.3)           | 3 (2.3)         | 0 (0)            | 0 (0)       |       | 4 (3.4)            | 0 (0)          | 0 (0)            | 0           |       |
| <b>MM Subtype (n, %)</b>               |                   |                 |                  |             |       |                    |                |                  |             |       |
| IgG                                    | 42 (56)           | 73 (56.6)       | 8 (57.1)         | 11 (44)     | 0.18  | 73 (61.9)          | 42 (48.8)      | 9 (45)           | 10 (52.6)   | 0.35  |
| IgA                                    | 14 (18.7)         | 33 (25.6)       | 4 (28.6)         | 13 (52)     |       | 22 (18.6)          | 25 (29.1)      | 9 (45)           | 8 (42.1)    |       |
| IgD                                    | 2 (2.7)           | 5 (3.8)         | 0 (0)            | 0 (0)       |       | 3 (2.5)            | 4 (4.7)        | 0 (0)            | 0 (0)       |       |
| IgM                                    | 1 (1.2)           | 0 (0)           | 0 (0)            | 0 (0)       |       | 1 (0.8)            | 0 (0)          | 0 (0)            | 0 (0)       |       |
| Light chain disease                    | 14 (18.7)         | 18 (14)         | 2 (14.3)         | 1 (4)       |       | 17 (14.4)          | 15 (17.4)      | 2 (10)           | 1 (5.3)     |       |
| Non secretory                          | 2 (2.7)           | 0 (0)           | 0 (0)            | 0 (0)       |       | 2 (1.7)            | 0 (0)          | 0 (0)            | 0 (0)       |       |
| <b>R-ISS stage (n, %)</b>              |                   |                 |                  |             |       |                    |                |                  |             |       |
| I                                      | 12 (27.3)         | 21 (25.9)       | 0 (0)            | 0 (0)       | 0.07  | 19 (25.0)          | 14 (28.6)      | 0 (0)            | 0 (0)       | 0.08  |
| II                                     | 23 (52.3)         | 45 (55.6)       | 7 (63.6)         | 16 (76.2)   |       | 43 (56.6)          | 25 (51.0)      | 11 (68.8)        | 12 (75.0)   |       |
| III                                    | 9 (20.5)          | 15 (18.5)       | 4 (36.4)         | 5 (23.8)    |       | 14 (18.4)          | 10 (20.4)      | 5 (31.2)         | 4 (25.0)    |       |
| <b>ISS stage (n, %)</b>                |                   |                 |                  |             |       |                    |                |                  |             |       |
| I                                      | 23 (37.7)         | 35 (33)         | 3 (27.3)         | 8 (34.8)    | 0.93  | 29 (30.5)          | 29 (40.3)      | 4 (23.5)         | 7 (41.2)    | 0.64  |
| II                                     | 19 (31.1)         | 37 (34.9)       | 4 (36.4)         | 10 (43.5)   |       | 32 (33.7)          | 24 (33.3)      | 8 (47.1)         | 6 (35.3)    |       |
| III                                    | 19 (31.1)         | 34 (32.1)       | 4 (36.4)         | 5 (21.7)    |       | 34 (35.8)          | 19 (26.4)      | 5 (29.4)         | 4 (23.5)    |       |
| <b>Hgb (n, %)</b>                      |                   |                 |                  |             |       |                    |                |                  |             |       |
| < 10 g/dL                              | 20 (27.8)         | 45 (36.9)       | 6 (42.9)         | 12 (48)     | 0.26  | 38 (33.6)          | 27 (33.3)      | 8 (40)           | 10 (52.6)   | 0.40  |
| <b>Creatinine (n, %)</b>               |                   |                 |                  |             |       |                    |                |                  |             |       |
| ≥ 2 mg/dL                              | 16 (22.5)         | 25 (20.5)       | 4 (28.6)         | 4 (16)      | 0.81  | 26 (23.2)          | 15 (18.5)      | 4 (20)           | 4 (21.1)    | 0.89  |
| <b>Calcium (n, %)</b>                  |                   |                 |                  |             |       |                    |                |                  |             |       |
| ≥ 11 mg/dL                             | 8 (11.8)          | 17 (14.5)       | 1 (7.1)          | 2 (8)       | 0.73  | 13 (11.8)          | 12 (16)        | 2 (10)           | 1 (5.3)     | 0.59  |
| <b>Albumin (n, %)</b>                  |                   |                 |                  |             |       |                    |                |                  |             |       |
| < 3.5 g/dL                             | 25 (37.9)         | 46 (41.4)       | 7 (53.8)         | 11 (44)     | 0.74  | 47 (46.1)          | 24 (32)        | 11 (57.9)        | 7 (36.8)    | 0.11  |
| <b>LDH (n, %)</b>                      |                   |                 |                  |             |       |                    |                |                  |             |       |
| ≥ 190 IU/L                             | 17 (37)           | 28 (33.7)       | 3 (33.3)         | 7 (35)      | 0.99  | 27 (34.2)          | 18 (36)        | 5 (35.7)         | 5 (33.3)    | 1.00  |
| <b>Beta-2 microglobulin (n, %)</b>     |                   |                 |                  |             |       |                    |                |                  |             |       |
| < 3.5 mg/L                             | 32 (51.6)         | 48 (44.4)       | 5 (45.5)         | 14 (60.9)   | 0.83  | 41 (42.3)          | 39 (53.4)      | 8 (47.1)         | 11 (64.7)   | 0.65  |
| 3.5-5.5 mg/L                           | 12 (19.4)         | 27 (25)         | 2 (18.2)         | 4 (17.4)    |       | 24 (24.7)          | 15 (20.6)      | 4 (23.5)         | 2 (11.8)    |       |
| > 5.5 mg/L                             | 18 (29)           | 33 (30.6)       | 4 (36.3)         | 5 (21.7)    |       | 32 (33)            | 19 (26)        | 5 (29.4)         | 4 (23.5)    |       |
| <b>t(11;14) (n, %)</b>                 |                   |                 |                  |             |       |                    |                |                  |             |       |
| Yes                                    | 19 (25.3)         | 24 (18.6)       | 0 (0)            | 1 (4)       | 0.03  | 29 (24.6)          | 14 (16.3)      | 0 (0)            | 1 (5.3)     | 0.2   |
| No                                     | 56 (74.7)         | 105 (81.4)      | 14 (100)         | 24 (96)     |       | 89 (75.4)          | 72 (83.7)      | 20 (100)         | 18 (94.7)   |       |
| <b>del(13q) (n, %)</b>                 |                   |                 |                  |             |       |                    |                |                  |             |       |
| Yes                                    | 37 (49.3)         | 77 (59.7)       | 8 (57.1)         | 22 (88)     | 0.01  | 62 (52.5)          | 52 (60.5)      | 14 (70)          | 16 (84.2)   | 0.05  |
| No                                     | 38 (50.7)         | 52 (40.3)       | 6 (42.9)         | 3 (12)      |       | 56 (47.5)          | 34 (39.5)      | 6 (30)           | 3 (15.8)    |       |
| <b>del(17p) (n, %)</b>                 |                   |                 |                  |             |       |                    |                |                  |             |       |
| Yes                                    | 7 (9.3)           | 20 (15.5)       | 2 (14.3)         | 3 (12)      | 0.65  | 15 (12.7)          | 12 (14)        | 2 (10)           | 3 (15.8)    | 0.95  |
| No                                     | 68 (90.7)         | 109 (84.5)      | 12 (85.7)        | 22 (88)     |       | 103 (87.3)         | 74 (86)        | 18 (90)          | 16 (84.2)   |       |
| <b>MAF translocations (n, %)</b>       |                   |                 |                  |             |       |                    |                |                  |             |       |
| Yes                                    | 1 (1.3)           | 8 (6.2)         | 0 (0)            | 3 (12)      | 0.12  | 3 (2.5)            | 6 (7.0)        | 1 (5)            | 2 (10.5)    | 0.32  |
| No                                     | 74 (98.7)         | 121 (93.8)      | 14 (100)         | 22 (88)     |       | 115 (97.5)         | 80 (93.0)      | 19 (95)          | 17 (89.5)   |       |
| <b>Copy Numbers of 1q</b>              |                   |                 |                  |             |       |                    |                |                  |             |       |
| 3 (gains)                              |                   | 107 (82.9)      |                  | 21 (84)     | <.001 |                    | 69 (80.2)      |                  | 15 (78.9)   | <.001 |
| 4 or more (amplifications)             |                   | 22 (17.1)       |                  | 4 (16)      |       |                    | 17 (19.8)      |                  | 4 (21.1)    |       |
| <b>Induction regimen (n, %)</b>        |                   |                 |                  |             |       |                    |                |                  |             |       |
| CyBorD                                 | 12 (16)           | 12 (9.3)        | 2 (14.3)         | 3 (12)      | 0.74  | 17 (14.4)          | 7 (8.1)        | 4 (20)           | 1 (5.3)     | 0.16  |
| VD                                     | 29 (38.7)         | 43 (33.4)       | 5 (35.7)         | 9 (36)      |       | 41 (34.7)          | 31 (36)        | 7 (35)           | 7 (36.8)    |       |
| RD                                     | 10 (13.3)         | 23 (17.8)       | 3 (21.4)         | 4 (16)      |       | 12 (10.2)          | 21 (24.5)      | 2 (10)           | 5 (26.3)    |       |
| VRD                                    | 12 (16)           | 36 (27.9)       | 4 (28.6)         | 6 (24)      |       | 31 (26.3)          | 17 (19.8)      | 7 (35)           | 3 (15.8)    |       |
| Others                                 | 12 (16)           | 15 (11.6)       | 0 (0)            | 3 (12)      |       | 17 (14.4)          | 10 (11.6)      | 0 (0)            | 3 (15.8)    |       |
| <b>Best response (n, %)</b>            |                   |                 |                  |             |       |                    |                |                  |             |       |
| CR                                     | 9 (12)            | 14 (10.9)       | 2 (14.3)         | 5 (20)      | 0.65  | 12 (10.1)          | 11 (12.8)      | 5 (25)           | 2 (10.5)    | 0.23  |
| VGPR                                   | 30 (40)           | 43 (33.3)       | 4 (28.6)         | 9 (36)      |       | 50 (42.4)          | 23 (26.7)      | 8 (40)           | 5 (26.3)    |       |
| PR                                     | 23 (30.7)         | 52 (40.3)       | 6 (42.9)         | 6 (24)      |       | 39 (33.1)          | 36 (41.9)      | 6 (30)           | 6 (31.6)    |       |



|                           |         |           |           |           |         |      |           |           |           |           |      |
|---------------------------|---------|-----------|-----------|-----------|---------|------|-----------|-----------|-----------|-----------|------|
|                           | SD      | 13 (17.3) | 16 (12.4) | 1 (7.1)   | 4 (16)  |      | 15 (12.7) | 14 (16.3) | 0 (0)     | 5 (26.3)  |      |
|                           | PD      | 0 (0)     | 4 (3.1)   | 1 (7.1)   | 1 (4)   |      | 2 (1.7)   | 2 (2.3)   | 1 (5)     | 1 (5.3)   |      |
| <b>Response</b> (n, %)    |         |           |           |           |         | 0.70 |           |           |           |           | 0.14 |
|                           | CR/VGPR | 39 (52)   | 57 (44.2) | 6 (42.9)  | 14 (56) |      | 62 (52.5) | 34 (39.5) | 13 (65)   | 7 (36.8)  |      |
|                           | PR      | 23 (30.7) | 52 (40.3) | 6 (42.9)  | 6 (24)  |      | 39 (33.1) | 36 (41.9) | 6 (30)    | 6 (31.6)  |      |
|                           | SD/PD   | 13 (17.3) | 20 (15.5) | 2 (14.2)  | 5 (20)  |      | 17 (14.4) | 16 (18.6) | 1 (5)     | 6 (31.6)  |      |
| <b>ASCT</b> (n, %)        |         |           |           |           |         | 0.54 |           |           |           |           | 0.37 |
|                           | No      | 25 (33.3) | 40 (31)   | 3 (21.4)  | 5 (20)  |      | 41 (34.7) | 24 (27.9) | 4 (20)    | 4 (21.1)  |      |
|                           | Yes     | 50 (66.7) | 89 (69)   | 11 (78.6) | 20 (80) |      | 77 (65.3) | 62 (72.1) | 16 (80)   | 15 (78.9) |      |
| <b>Maintenance</b> (n, %) |         |           |           |           |         | 0.44 |           |           |           |           | 0.47 |
|                           | No      | 5 (10)    | 13 (14.6) | 2 (18.2)  | 5 (25)  |      | 11 (14.3) | 7 (11.3)  | 3 (18.7)  | 4 (26.7)  |      |
|                           | Yes     | 45 (90)   | 76 (85.4) | 9 (81.8)  | 15 (75) |      | 66 (85.7) | 55 (88.7) | 13 (81.3) | 11 (73.3) |      |

**Abbreviations:** DH, double Hit; *p*, p-value; NHW, non-hispanic white; NHB, non-hispanic black; MM, Multiple Myeloma; ISS, International staging system; R-ISS, Revised-ISS; Hgb, hemoglobin; LDH, lactate dehydrogenase; CyBorD, cyclophosphamide, bortezomib, dexamethasone; VD, bortezomib, dexamethasone; RD, lenalidomide, dexamethasone; VRD, bortezomib, lenalidomide, dexamethasone; CR, complete response; VGPR, very good partial response; PR, partial response; SD, stable disease; PD, progressive disease; ASCT, autologous stem cell transplant.

**Supplementary Table S3.** Patient characteristics for 1q+ analysis

|                                         |                     | “Low/Neg”<br>(n = 79) | 1q21+<br>only<br>(n = 59) | 1q23+<br>only<br>(n = 10) | Both<br>(n = 95) | p    |
|-----------------------------------------|---------------------|-----------------------|---------------------------|---------------------------|------------------|------|
| <b>Age at diagnosis</b> , Median, Range |                     | 60.0 (38-86)          | 64.0 (35-82)              | 61.5 (55-78)              | 61.0 (39-90)     | 0.39 |
| <b>Gender</b> (n, %)                    |                     |                       |                           |                           |                  | 0.20 |
|                                         | Female              | 29 (36.7)             | 30 (50.8)                 | 4 (40)                    | 49 (51.6)        |      |
|                                         | Male                | 50 (63.3)             | 29 (49.2)                 | 6 (60)                    | 46 (48.4)        |      |
| <b>Race</b> (n, %)                      |                     |                       |                           |                           |                  | 0.19 |
|                                         | NHW                 | 67 (84.8)             | 44 (74.6)                 | 9 (90)                    | 84 (88.4)        |      |
|                                         | NHB                 | 11 (13.9)             | 12 (20.3)                 | 1 (10)                    | 11 (11.6)        |      |
|                                         | Other               | 1 (1.3)               | 3 (5.1)                   | 0 (0)                     | 0 (0)            |      |
| <b>MM Subtype</b> (n, %)                |                     |                       |                           |                           |                  | 0.29 |
|                                         | IgG                 | 43 (54.4)             | 39 (66.1)                 | 7 (70)                    | 45 (47.4)        |      |
|                                         | IgA                 | 16 (20.3)             | 15 (25.4)                 | 2 (20)                    | 31 (32.6)        |      |
|                                         | IgD                 | 2 (2.5)               | 1 (1.7)                   | 0 (0)                     | 4 (4.2)          |      |
|                                         | IgM                 | 1 (1.3)               | 0 (0)                     | 0 (0)                     | 0 (0)            |      |
|                                         | Light chain disease | 15 (19)               | 4 (6.8)                   | 1 (10)                    | 15 (15.8)        |      |
|                                         | Non secretory       | 2 (2.5)               | 0 (0)                     | 0 (0)                     | 0 (0)            |      |
| <b>R-ISS stage</b> (n, %)               |                     |                       |                           |                           |                  | 0.77 |
|                                         | I                   | 10 (19.6)             | 9 (22)                    | 2 (50)                    | 12 (19.7)        |      |
|                                         | II                  | 29 (56.9)             | 25 (61)                   | 1 (25)                    | 36 (59)          |      |
|                                         | III                 | 12 (23.5)             | 7 (17)                    | 1 (25)                    | 13 (21.3)        |      |
| <b>ISS stage</b> (n, %)                 |                     |                       |                           |                           |                  | 0.44 |
|                                         | I                   | 22 (34.4)             | 11 (22.9)                 | 4 (50)                    | 32 (39.5)        |      |
|                                         | II                  | 20 (31.3)             | 20 (41.7)                 | 3 (37.5)                  | 27 (33.3)        |      |
|                                         | III                 | 22 (34.3)             | 17 (35.4)                 | 1 (12.5)                  | 22 (27.2)        |      |
| <b>Hgb</b> (n, %)                       |                     |                       |                           |                           |                  | 0.52 |
|                                         | < 10 g/dL           | 24 (31.6)             | 22 (38.6)                 | 2 (20)                    | 35 (38.9)        |      |
| <b>Serum creatinine</b> (n, %)          |                     |                       |                           |                           |                  | 0.90 |
|                                         | ≥ 2 mg/dL           | 18 (24)               | 12 (21.1)                 | 2 (20)                    | 17 (18.9)        |      |
| <b>Calcium</b> (n, %)                   |                     |                       |                           |                           |                  | 0.94 |
|                                         | ≥ 11 mg/dL          | 8 (11)                | 7 (12.3)                  | 1 (11.1)                  | 12 (14.1)        |      |
| <b>Albumin</b> (n, %)                   |                     |                       |                           |                           |                  | 0.07 |
|                                         | < 3.5 g/dL          | 29 (42)               | 29 (55.8)                 | 3 (30)                    | 28 (33.3)        |      |
| <b>LDH</b> (n, %)                       |                     |                       |                           |                           |                  | 0.20 |
|                                         | ≥ 190 IU/L          | 16 (32)               | 16 (37.2)                 | 4 (80)                    | 19 (31.7)        |      |
| <b>Beta-2 microglobulin</b> (n, %)      |                     |                       |                           |                           |                  | 0.40 |
|                                         | < 3.5 mg/L          | 31 (47.7)             | 18 (36.7)                 | 6 (75)                    | 44 (53.7)        |      |
|                                         | 3.5-5.5 mg/L        | 13 (20)               | 15 (30.6)                 | 1 (12.5)                  | 16 (19.5)        |      |
|                                         | > 5.5 mg/L          | 21 (32.3)             | 16 (32.7)                 | 1 (12.5)                  | 22 (26.8)        |      |
| <b>t(11;14)</b> (n, %)                  |                     |                       |                           |                           |                  | 0.5  |
|                                         | Yes                 | 18 (22.8)             | 11 (18.7)                 | 1 (10)                    | 14 (14.7)        |      |
|                                         | No                  | 61 (77.2)             | 48 (81.3)                 | 9 (90)                    | 81 (85.3)        |      |
| <b>del(13q)</b> (n, %)                  |                     |                       |                           |                           |                  | 0.12 |
|                                         | Yes                 | 41 (51.9)             | 35 (59.3)                 | 4 (40)                    | 64 (67.3)        |      |

|                                  |                            |           |           |          |           |        |
|----------------------------------|----------------------------|-----------|-----------|----------|-----------|--------|
|                                  | No                         | 38 (48.1) | 24 (40.7) | 6 (60)   | 31 (32.7) |        |
| <b>del(17p) (n, %)</b>           | Yes                        | 8 (10.1)  | 9 (15.3)  | 1 (10)   | 14 (14.7) | 0.76   |
|                                  | No                         | 71 (89.9) | 50 (84.7) | 9 (90)   | 81 (85.3) |        |
| <b>MAF translocations (n, %)</b> | Yes                        | 1 (1.3)   | 3 (10.2)  | 0 (0)    | 8 (8.4)   | 0.16   |
|                                  | No                         | 78 (98.7) | 56 (89.8) | 10 (100) | 87 (91.6) |        |
| <b>Copy numbers of 1q (n, %)</b> | 3 (gains)                  |           | 49 (83)   | 7 (70)   | 78 (82.1) | <0.001 |
|                                  | 4 or more (amplifications) |           | 30 (17)   | 3 (30)   | 17 (17.9) |        |
| <b>Induction regimen (n, %)</b>  | CyBorD                     | 13 (16.5) | 8 (13.6)  | 1 (10)   | 7 (7.4)   | 0.05   |
|                                  | VD                         | 31 (39.1) | 17 (28.8) | 3 (30)   | 35 (36.8) |        |
|                                  | RD                         | 10 (12.7) | 4 (6.7)   | 3 (30)   | 23 (24.2) |        |
|                                  | VRD                        | 15 (19)   | 23 (39)   | 1 (10)   | 19 (20)   |        |
|                                  | Others                     | 10 (12.7) | 7 (11.9)  | 2 (20)   | 11 (11.6) |        |
| <b>Best response (n, %)</b>      | CR                         | 10 (12.7) | 7 (11.9)  | 1 (10)   | 12 (12.6) | 0.23   |
|                                  | VGPR                       | 29 (36.6) | 29 (49.2) | 5 (50)   | 23 (24.2) |        |
|                                  | PR                         | 27 (34.2) | 18 (30.4) | 2 (20)   | 40 (42.1) |        |
|                                  | SD                         | 12 (15.2) | 3 (5.1)   | 2 (20)   | 17 (17.9) |        |
|                                  | PD                         | 1 (1.3)   | 2 (3.4)   | 0 (0)    | 3 (3.2)   |        |
| <b>Response (n, %)</b>           | CR/VGPR                    | 39 (49.4) | 36 (61)   | 6 (60)   | 35 (36.8) | 0.08   |
|                                  | PR                         | 27 (34.2) | 18 (30.5) | 2 (20)   | 40 (42.1) |        |
|                                  | SD/PD                      | 13 (16.4) | 5 (8.5)   | 2 (20)   | 20 (21.1) |        |
| <b>ASCT (n, %)</b>               | No                         | 25 (31.6) | 20 (33.9) | 3 (30)   | 25 (26.3) | 0.75   |
|                                  | Yes                        | 54 (68.4) | 39 (66.1) | 7 (70)   | 70 (73.7) |        |
| <b>Maintenance (n, %)</b>        | No                         | 7 (13.0)  | 7 (17.9)  | 0 (0)    | 11 (15.7) | 0.76   |
|                                  | Yes                        | 47 (87.0) | 32 (82.1) | 7 (100)  | 59 (84.3) |        |

*Abbreviations:* DH, double Hit; *p*, p-value; NHW, non-hispanic white; NHB, non-hispanic black; MM, Multiple Myeloma; ISS, International staging system, R-ISS, Revised-ISS; Hgb, hemoglobin; LDH, lactate dehydrogenase; CyBorD, cyclophosphamide, bortezomib, dexamethasone; VD, bortezomib, dexamethasone; RD, lenalidomide, dexamethasone; VRD, bortezomib, lenalidomide, dexamethasone; CR, complete response; VGPR, very good partial response; PR, partial response; SD, stable disease; PD, progressive disease; ASCT, autologous stem cell transplant.

**Supplementary Table S4.** Regression analysis for factors associated with progression-free survival (PFS) or Overall survival (OS) in the different groups.

|                 | PFS  |           |          | OS   |           |          |
|-----------------|------|-----------|----------|------|-----------|----------|
|                 | HR   | 95% CI    | <i>p</i> | HR   | 95% CI    | <i>p</i> |
| <b>1q21+</b>    | 0.99 | 0.58-1.67 | 0.967    | 0.69 | 0.38-1.27 | 0.238    |
| <b>t(4,14)</b>  | 0.69 | 0.27-1.76 | 0.44     | 0.68 | 0.23-2.01 | 0.489    |
| <b>“Low CA”</b> | 0.52 | 0.29-0.94 | 0.029    | 0.38 | 0.18-0.79 | 0.009    |
| <b>Age</b>      | 0.99 | 0.97-1.02 | 0.611    | 1.02 | 0.99-1.05 | 0.246    |
| <b>Gain(1q)</b> | 0.96 | 0.47-1.94 | 0.905    | 1.04 | 0.43-2.52 | 0.935    |
| <b>Amp(1q)</b>  | 1.06 | 0.49-2.29 | 0.889    | 1.45 | 0.56-3.76 | 0.45     |

|                 |      |           |       |      |           |       |
|-----------------|------|-----------|-------|------|-----------|-------|
| <b>1q23+</b>    | 0.68 | 0.38-1.22 | 0.2   | 0.57 | 0.30-1.08 | 0.082 |
| <b>t(4,14)</b>  | 0.44 | 0.19-1.03 | 0.058 | 0.54 | 0.19-1.59 | 0.265 |
| <b>“Low CA”</b> | 0.47 | 0.25-0.87 | 0.017 | 0.38 | 0.18-0.78 | 0.008 |
| <b>Age</b>      | 0.99 | 0.97-1.02 | 0.557 | 1.02 | 0.99-1.05 | 0.32  |
| <b>Gain(1q)</b> | 1.01 | 0.63-1.62 | 0.976 | 1.22 | 0.60-2.46 | 0.584 |
| <b>Amp(1q)</b>  | 1.03 | 0.56-1.89 | 0.973 | 1.75 | 0.77-4.01 | 0.183 |

|                    |      |           |       |      |           |       |
|--------------------|------|-----------|-------|------|-----------|-------|
| <b>1q21+</b>       | 1.60 | 0.90-2.86 | 0.11  | 1.14 | 0.51-2.56 | 0.745 |
| <b>1q23+</b>       | 0.69 | 0.25-1.90 | 0.471 | 0.52 | 0.14-1.93 | 0.328 |
| <b>Both</b>        | 1.92 | 1.21-3.04 | 0.005 | 1.99 | 1.08-3.64 | 0.027 |
| <b>Age</b>         | 0.99 | 0.97-1.02 | 0.53  | 1.01 | 0.98-1.05 | 0.347 |
| <b>Gain(1q21+)</b> | 0.79 | 0.41-1.52 | 0.476 | 0.75 | 0.32-1.76 | 0.508 |
| <b>Amp(1q21+)</b>  | 1.01 | 0.34-3.03 | 0.981 | 1.14 | 0.29-4.54 | 0.848 |
| <b>Gain(1q23+)</b> | 1.26 | 0.75-2.12 | 0.376 | 1.24 | 0.61-2.52 | 0.557 |
| <b>Amp(1q23+)</b>  | 0.98 | 0.33-2.88 | 0.972 | 1.12 | 0.29-4.33 | 0.874 |

*Abbreviations:* HR, Hazard Ratio; CI, Confidence interval; *p*, p-value; CA, chromosomal abnormalities.

### 3. Supplementary Figures:

**Supplementary Figure S1. Outcomes of all patients with the defined chromosomal abnormalities.** Log-rank  $p$  values and number at risk are reported for each graph in the panel.  $n = 170$  patients who underwent ASCT. **(A, B)** PFS and OS from ASCT in patients with  $1q+$ ,  $t(4;14)$ , and combined  $1q+$  and  $t(4;14)$ , independently of cutoffs.  $p$  are not significant.

**Supplementary Figure S2. Study design and response rates.** **A.** Clone sizes of patients with  $1q21+$  ( $n = 216$ , median = 48.75),  $1q23+$  ( $n = 156$ , median = 53.95), and  $t(4;14)$  ( $n = 45$ , median = 78.5). **B.** Chromosome 1 probe representation. **C.** Schema of the reported analyses.  $1q21+$ ,  $1q23+$ , and  $1q+$  analyses cohorts are shown. **(D-F).** Best responses are divided as complete responses/very good partial responses (CR/VGPR, light orange), partial responses (PR, orange), or stable disease, progressive disease (SD/PD, burgundy) in: **D.** patients with “Low CA”,  $1q21+$  only,  $t(4;14)$  only, or DH MM.  $p = 0.70$ . **E.** patients with “Low CA”,  $1q23+$  only,  $t(4;14)$  only, or DH MM.  $p = 0.14$ . **F.** patients with “Low/Neg”,  $1q21+$  only,  $1q23+$  only, and combined  $1q21+$  and  $1q23+$  (Both).  $p = 0.23$ .

**Supplementary Figure S3. CD56 clone size and mRNA expression in the different subgroups.** **A.** FPKM levels of CD56 in the CoMMpass MMRF database in patients with  $1q+$  ( $n = 133$ ),  $t(4;14)$  ( $n = 36$ ), and DH ( $n = 36$ ) MM.  $p$   $1q+$  versus  $t(4;14) < 0.0001$  (\*\*\*\*),  $p$   $1q+$  versus DH  $< 0.0001$  (\*\*\*\*);  $p$   $t(4;14)$  versus DH, Not significant. ANOVA Summary  $p < 0.0001$ . **B.** Violin plots showing the percentage of CD56-expressing clonal MM cells in patients with  $1q23+$  ( $n = 77$ ),  $t(4;14)$  ( $n = 15$ ), DH ( $n = 18$ ), or “Low CA” ( $n = 95$ ) MM in our database. **C.** Violin plots showing the percentage of CD56-expressing clonal MM cells

in patients with 1q21+ only (n = 51), 1q23+ only (n = 10), combined 1q21+ and 1q23+ (Both, n = 85), or no or low levels of 1q+ (“Low/neg”, n = 58). *p* are not significant. In each panel, number of patients, median, and average values are reported below the plotted data. Blue dotted lines highlight the median values.

**Supplementary Figure S4. Immune profiling in selected patients with 1q+ only, t(4;14) only, or DH MM.** **A.** Percentages of CD3<sup>+</sup>CD4<sup>+</sup>CD25<sup>+</sup> T cells (T regulatory cells) in healthy donors, HD (n = 7), patients with 1q+ (n = 14), t(4;14) (n = 4), or DH (n = 7) MM. ANOVA *p* = 0.0099; *p* HD versus DH = 0.0125 (\*); *p* 1q+ versus DH = 0.022 (\*). **B.** Percentages of CD3<sup>+</sup>CD4<sup>+</sup>LAG3<sup>+</sup> T cells in HD (n = 7), patients with 1q+ (n = 13), t(4;14) (n = 4), or DH (n = 7) MM. ANOVA *p* = 0.0002. *p* 1q+ versus DH = 0.0021 (\*\*), *p* 1q+ versus t(4;14) = 0.0234 (\*); *p* HD versus DH = 0.0011 (\*\*); *p* HD versus t(4;14) = 0.0097 (\*\*). **C.** t-SNE analysis combining LAG3<sup>+</sup> cells in the three conditions.

**Supplementary Figure S1**

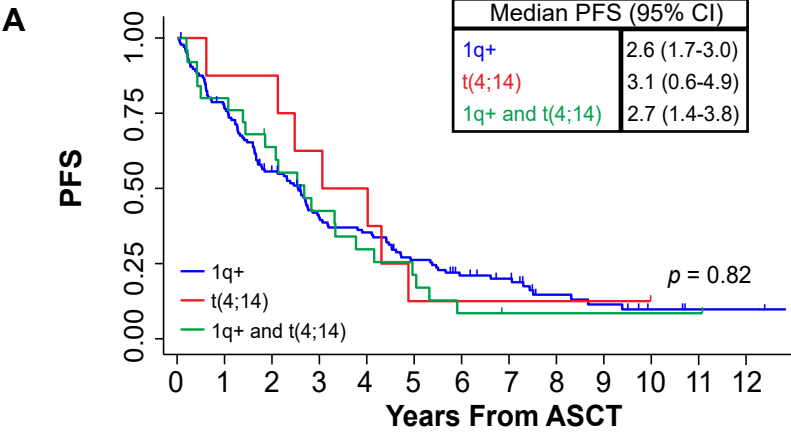

Number at risk

|                 | 0   | 1   | 2  | 3  | 4  | 5  | 6  | 7  | 8 | 9 | 10 | 11 | 12 |
|-----------------|-----|-----|----|----|----|----|----|----|---|---|----|----|----|
| 1q+             | 137 | 103 | 72 | 49 | 43 | 31 | 22 | 18 | 9 | 7 | 3  | 1  | 1  |
| t(4;14)         | 8   | 7   | 7  | 5  | 4  | 1  | 1  | 1  | 1 | 1 | 0  | 0  | 0  |
| 1q+ and t(4;14) | 25  | 20  | 15 | 10 | 7  | 5  | 2  | 1  | 1 | 1 | 1  | 1  | 0  |

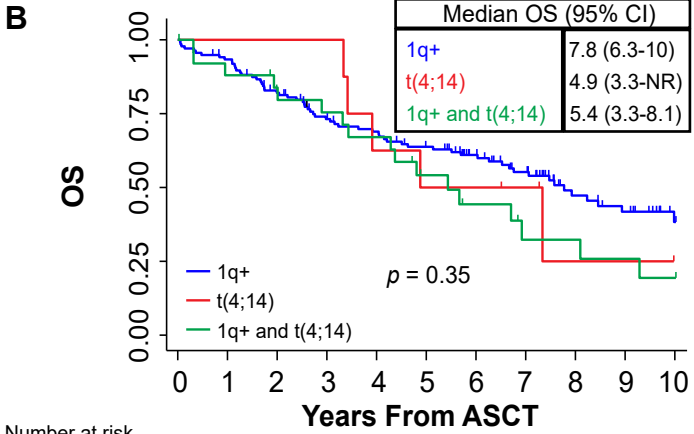

Number at risk

|                 | 0   | 1   | 2   | 3  | 4  | 5  | 6  | 7  | 8  | 9  | 10 |
|-----------------|-----|-----|-----|----|----|----|----|----|----|----|----|
| 1q+             | 137 | 125 | 106 | 87 | 81 | 72 | 56 | 45 | 27 | 22 | 11 |
| t(4;14)         | 8   | 8   | 8   | 8  | 5  | 4  | 4  | 3  | 1  | 1  | 0  |
| 1q+ and t(4;14) | 25  | 22  | 20  | 18 | 16 | 11 | 8  | 5  | 5  | 4  | 3  |

**Supplementary Figure S1. Outcomes of all patients with the defined chromosomal abnormalities.** Log-rank  $p$  values and number at risk are reported for each graph in the panel.  $n = 170$  patients who underwent ASCT. **(A, B)** PFS and OS from ASCT in patients with 1q+, t(4;14), and combined 1q+ and t(4;14), independently of cutoffs.  $p$  are not significant.

## Supplementary Figure S2

**A**

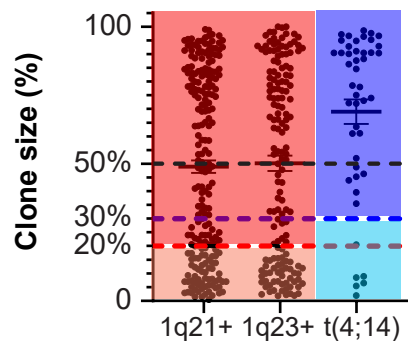

**B**

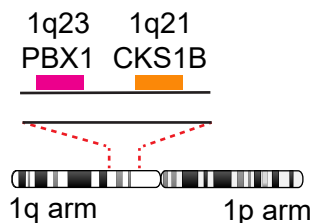

**C**

Clone size cutoffs

| 1q21+ analysis   | 1q23+ analysis   | 1q+ analysis     |
|------------------|------------------|------------------|
| 1q21+ (n = 129)  | 1q23+ (n = 86)   | Both (n = 95)    |
| t(4;14) (n = 14) | t(4;14) (n = 20) | 1q21+ (n = 59)   |
| DH (n = 25)      | DH (n = 19)      | 1q23+ (n = 10)   |
| Low CA (n = 75)  | Low CA (n = 118) | Low/Neg (n = 79) |

**D**

1q21+ analysis

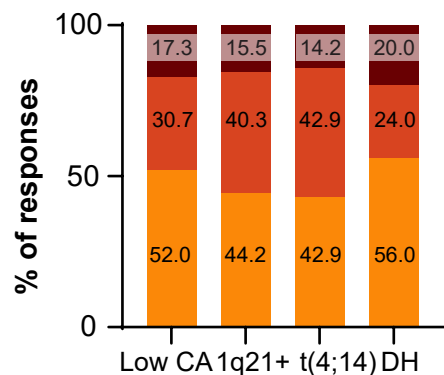

**E**

1q23+ analysis

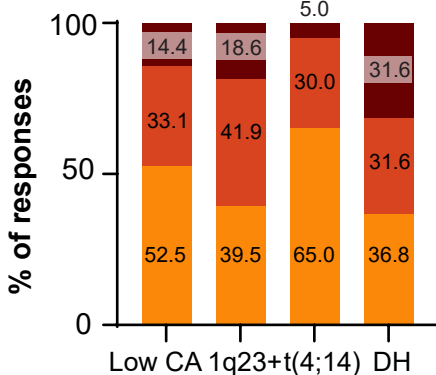

**F**

1q+ analysis

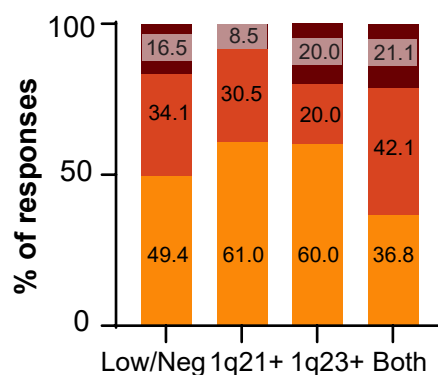

**Supplementary Figure S2. Study design and response rates.** **A.** Clone sizes of patients with 1q21+ (n = 216, median = 48.75), 1q23+ (n = 156, median = 53.95), and t(4;14) (n = 45, median = 78.5). **B.** Chromosome 1 probe representation. **C.** Schema of the reported analyses. 1q21+, 1q23+, and 1q+ analyses cohorts are shown. **(D-F).** Best responses are divided as complete responses/very good partial responses (CR/VGPR- light orange), partial responses (PR- orange), or stable disease, progressive disease (SD/PD, burgundy) in: **D.** patients with “Low CA”, 1q21+ only, t(4;14) only, or DH MM.  $p = 0.70$ . **E.** patients with “Low CA”, 1q23+ only, t(4;14) only, or DH MM.  $p = 0.14$ . **F.** in patients with “Low/Neg”, 1q21+ only, 1q23+ only, and combined 1q21+ and 1q23+ (Both).  $p = 0.23$ .



### Supplementary Figure S3

**A**

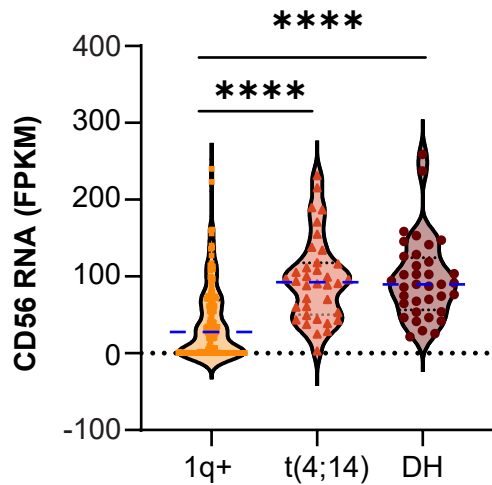

|          | 1q+   | t(4;14) | DH    |
|----------|-------|---------|-------|
| n:       | 133   | 36      | 36    |
| Median:  | 27.55 | 92.47   | 89.1  |
| Average: | 41.26 | 96.04   | 96.29 |

**B**

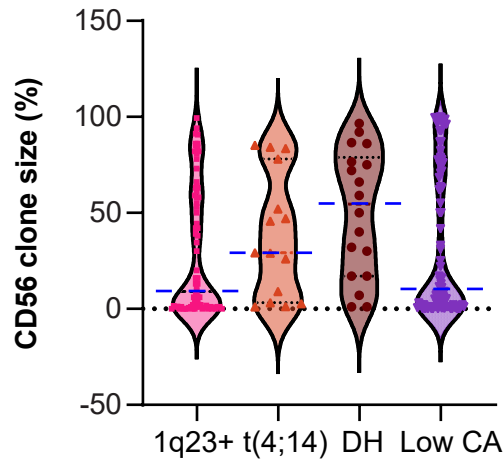

|          | 1q23+ | t(4;14) | DH    | Low CA |
|----------|-------|---------|-------|--------|
| n:       | 77    | 15      | 18    | 95     |
| Median:  | 9     | 29.20   | 54.5  | 8.00   |
| Average: | 29.58 | 38.5    | 50.26 | 30.51  |

**C**

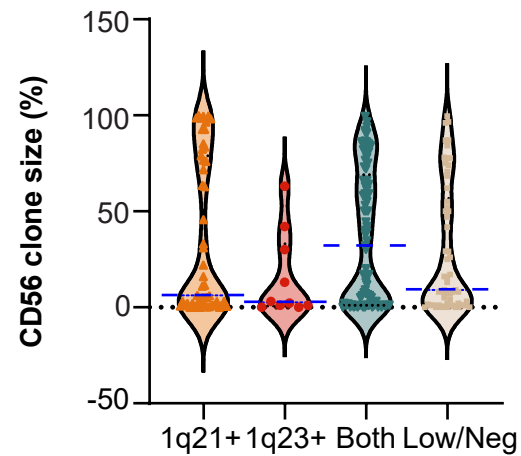

|          | 1q21+ | 1q23+ | Both  | Low/Neg |
|----------|-------|-------|-------|---------|
| n:       | 51    | 10    | 85    | 58      |
| Median:  | 6.3   | 2.6   | 32    | 9.050   |
| Average: | 34.96 | 15.52 | 36.95 | 29.14   |

### Supplementary Figure S3. CD56 clone size and mRNA expression in the different subgroups.

**A.** FPKM levels of CD56 in the CoMMpass MMRF database in patients with 1q+ (n = 133), t(4;14) (n = 36), and DH (n = 36) MM.  $p$  1q+ versus t(4;14) < 0.0001 (\*\*\*\*),  $p$  1q+ versus DH < 0.0001 (\*\*\*\*);  $p$  t(4;14) versus DH, Not significant. ANOVA Summary  $p$  < 0.0001. **B.** Violin plots showing the percentage of CD56-expressing clonal MM cells in patients with 1q23+ (n = 77), t(4;14) (n = 15), DH (n = 18), or “Low CA” (n = 95) MM in our database. **C.** Violin plots showing the percentage of CD56-expressing clonal MM cells in patients with 1q21+ only (n = 51), 1q23+ only (n = 10), 1q21+ and 1q23+ (Both, n = 85), or no or low levels of 1q+ (Low/Neg, n = 58).  $p$  are not significant. In each panel, number of patients, median, and average values are reported below the plotted data. Blue dotted lines highlight the median values.

**Supplementary Figure S4**

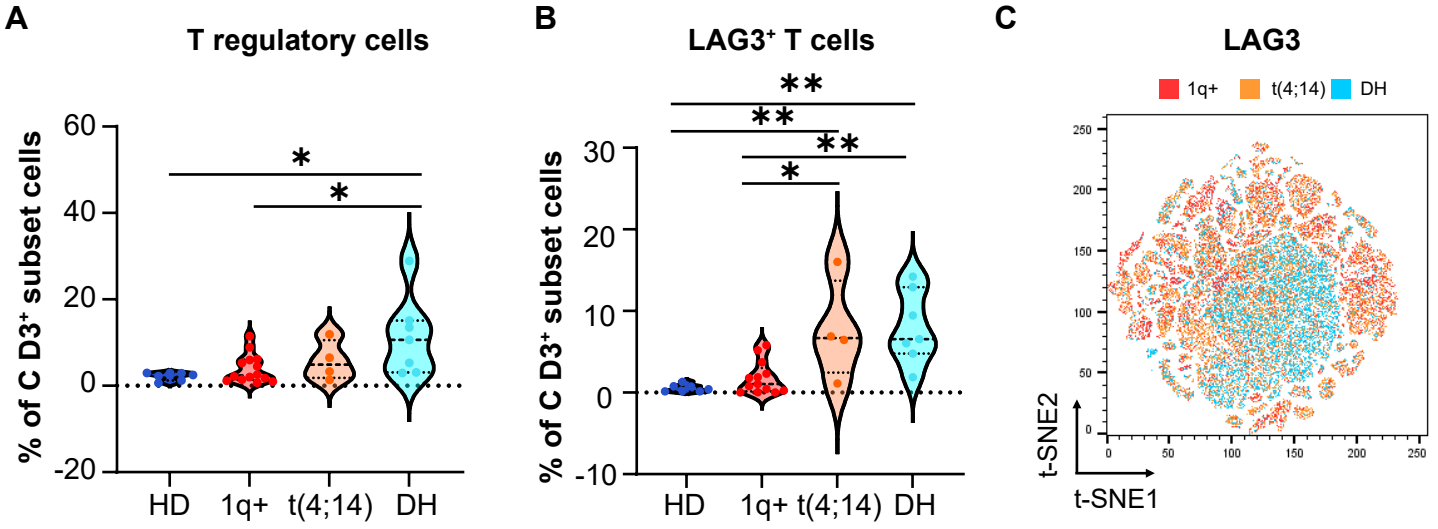

**Supplementary Figure S4. Immune profiling in selected patients with 1q+ only, t(4;14) only, or DH MM.**  
**A.** Percentages of CD3<sup>+</sup>CD4<sup>+</sup>CD25<sup>+</sup> T cells (T regulatory cells) in healthy donors, HD (n = 7), patients with 1q+ (n = 14), t(4;14) (n = 4), or DH (n = 7) MM. ANOVA  $p = 0.0099$ ;  $p$  HD versus DH = 0.0125 (\*);  $p$  1q+ versus DH = 0.022 (\*). **B.** Percentages of CD3<sup>+</sup>CD4<sup>+</sup>LAG3<sup>+</sup> T cells in HD (n = 7), patients with 1q+ (n = 13), t(4;14) (n = 4), or DH (n = 7) MM. ANOVA  $p = 0.0002$ .  $p$  1q+ versus DH = 0.0021 (\*\*),  $p$  1q+ versus t(4;14) = 0.0234 (\*);  $p$  HD versus DH = 0.0011 (\*\*);  $p$  HD versus t(4;14) = 0.0097 (\*\*). **C.** t-SNE analysis combining LAG3<sup>+</sup> cells in the three conditions.
